# Supplementary material for: Goals of Care, Critical Care Utilization and Clinical Outcomes in Obese Patients Admitted under General Medicine
Source: MDPI journal article supplement (doi:10.3390/jcm11247267), 2022-12-07
Supplement: s1 [file s1]

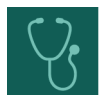

**Table S2.** Multivariable ordinal logistic regression of goals of care categories on other predictors ( $n = 4599$ ).

| Model and variables                  | Odds ratio | 95% C.I.    | <i>p</i> -value | <i>p</i> -value for parallel lines assumption <sup>1</sup> |
|--------------------------------------|------------|-------------|-----------------|------------------------------------------------------------|
| <i>Model 1</i>                       |            |             |                 | 0.66                                                       |
| Obesity                              | 0.65       | 0.55 – 0.78 | <0.001          | 0.63                                                       |
| Functional or social decline         | 1.91       | 1.46 – 2.49 | <0.001          | 0.47                                                       |
| Charlson Index, per 1-point increase | 1.46       | 1.43 – 1.50 | <0.001          | <0.001                                                     |
| <i>Model 2</i>                       |            |             |                 | 0.32                                                       |
| Obesity                              | 0.94       | 0.79 – 1.11 | 0.50            | 0.33                                                       |
| Functional or social decline         | 1.57       | 1.20 – 2.04 | 0.001           | 0.28                                                       |
| Age, per 5-year increase             | 1.56       | 1.52 – 1.60 | <0.001          | <0.001                                                     |
| <i>Model 3</i>                       |            |             |                 | 0.39                                                       |
| Obesity                              | 1.00       | 0.84 – 1.19 | 0.99            | 0.49                                                       |
| Functional or social decline         | 1.35       | 1.03 – 1.77 | 0.030           | 0.35                                                       |
| Age, per 5-year increase             | 1.52       | 1.48 – 1.56 | <0.001          | <0.001                                                     |
| Dementia                             | 3.84       | 3.19 – 4.61 | <0.001          | 0.25                                                       |
| <i>Model 4</i>                       |            |             |                 | 0.35                                                       |
| Obesity                              | 0.97       | 0.80 – 1.16 | 0.71            | 0.64                                                       |
| Functional or social decline         | 1.51       | 1.15 – 2.00 | 0.003           | 0.62                                                       |
| Age, per 5-year increase             | 1.52       | 1.48 – 1.57 | <0.001          | <0.001                                                     |
| Dementia                             | 4.61       | 3.81 – 5.58 | <0.001          | 0.09                                                       |
| Heart failure                        | 1.79       | 1.53 – 2.07 | <0.001          | <0.001                                                     |
| Chronic lung disease                 | 1.52       | 1.31 – 1.75 | <0.001          | <0.001                                                     |
| Chronic kidney disease               | 1.35       | 1.11 – 1.64 | 0.002           | 0.24                                                       |
| Cancer                               | 1.40       | 1.34 – 1.45 | <0.001          | 0.03                                                       |
| Stroke or transient ischemic attack  | 1.74       | 1.47 – 2.06 | <0.001          | 0.64                                                       |

<sup>1</sup> Insignificant test statistic indicates that the final model does not violate the proportional odds (parallel lines) assumption. Test of partial proportional odds are also provided next to each variable in the model.
