# Supplementary material for: Goals of Care, Critical Care Utilization and Clinical Outcomes in Obese Patients Admitted under General Medicine
Source: MDPI journal article supplement (doi:10.3390/jcm11247267), 2022-12-07
Supplement: s1 [file s1]

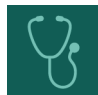

### Supplementary Figure S1.

Electronic version of the goals of care form available on the electronic medical records (EMR) system. The form combines tick boxes and free text fields. Prior to September 2019, a paper version of the goals of care form was in use which was identical to the electronic version.

## Goals of Patient Care Summary

Ask Patient/Family and check SMR Legal Tab

**Does the Patient have an Advance Care Plan?** ☐ Yes ☒ No

**Medical Treatment Decision Maker (MTDM)?** ☐ Formally appointed ☐ Via hierarchy

**Name:**  **Relationship:**  **Phone:**

### GOALS OF CARE STATUS

☐ A - No limitation of treatment  
☐ B - Limitation of medical treatment  
☐ C - Supportive/Palliative  
☐ D - Terminal

### NO LIMITATION OF TREATMENT - GOALS OF CARE A

Goal of care is curative or restorative  
For full resuscitation and all appropriate life sustaining treatment

For CPR/CODE BLUE  
For MET CALL

### LIMITATION OF MEDICAL TREATMENT – B or C or D

**Reason for limitation of medical treatment: (Tick all that apply)**

☐ Medical decision ☐ Patient decision ☐ Decision of medical treatment decision maker

### LIMITATION OF MEDICAL TREATMENT – B or C or D

**Reason for limitation of medical treatment: (Tick all that apply)**

☐ Medical decision ☐ Patient decision ☐ Decision of medical treatment decision maker

**Limitation of Medical Treatment Comments:**

Segoe UI 9

### LIMITATION OF MEDICAL TREATMENT – GOALS OF CARE B

**B. LIMITATION OF MEDICAL TREATMENT**

**Specify Limits:**

NOT for CPR/CODE BLUE  
For MET CALL

Segoe UI 9

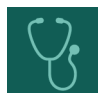

**LIMITATION OF MEDICAL TREATMENT – GOALS OF CARE C**

**C. SUPPORTIVE / PALLIATIVE**

**NOT for ICU ADMISSION  
NOT for CPR/CODE BLUE  
NOT for MET CALL**

**Specify Limits:**

Segoe UI 9

**For MET CALL:**

☐ No

**LIMITATION OF MEDICAL TREATMENT – GOALS OF CARE D**

**D. TERMINAL (Prognosis hours or days)**

**NOT for CPR/CODE BLUE  
NOT for ICU ADMISSION  
NOT for MET CALL**

**Specify Limits:**

Segoe UI 9

**Start PICD**

☐ Yes

☐ No

**Goals of care discussed with:**

- ☐ Patient ☐ Other:
- ☐ Medical Treatment Decision Maker
- ☐ Previously discussed
- ☐ Not discussed

**Details of discussion can be found in progress notes on these dates:**

**Reason not discussed**

**Doctor Name**

**Pager:**

**Designation:**

☐ Registrar

☐ Consultant

☐ HMO (in consultation with Registrar/Consultant)

**Consultant Medical Practitioner responsible for decision:**
